# Supplementary material for: Gene Introgression in Weeds Depends on Initial Gene Location in the Crop:Brassica napus–Raphanus raphanistrumModel
Source: Oxford University Press journal article supplement (doi:10.1534/genetics.117.201715), 2017-05-23
Supplement: figures3.pdf [file figures3.pdf]

Plants of G5 generation

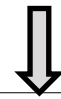

Open pollination by wild radish

G6 : Selection of introgressed male fertile plants

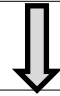

x wild radish

G7: Selection of introgressed male fertile plants

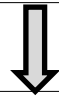

x wild radish

G8: Selection of  
introgressed male  
fertile plants

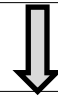

wild radish x

G8: Selection of  
introgressed male  
fertile plants

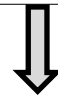

G9: Introgressed male fertile plants  
and wild radish/cage
